# Supplementary material
Source: Springer Nature journal article supplement (https://www.springermedizin.de/resource/supplementary/12903_2008_126_MOESM4_ESM.pdf/9517376)

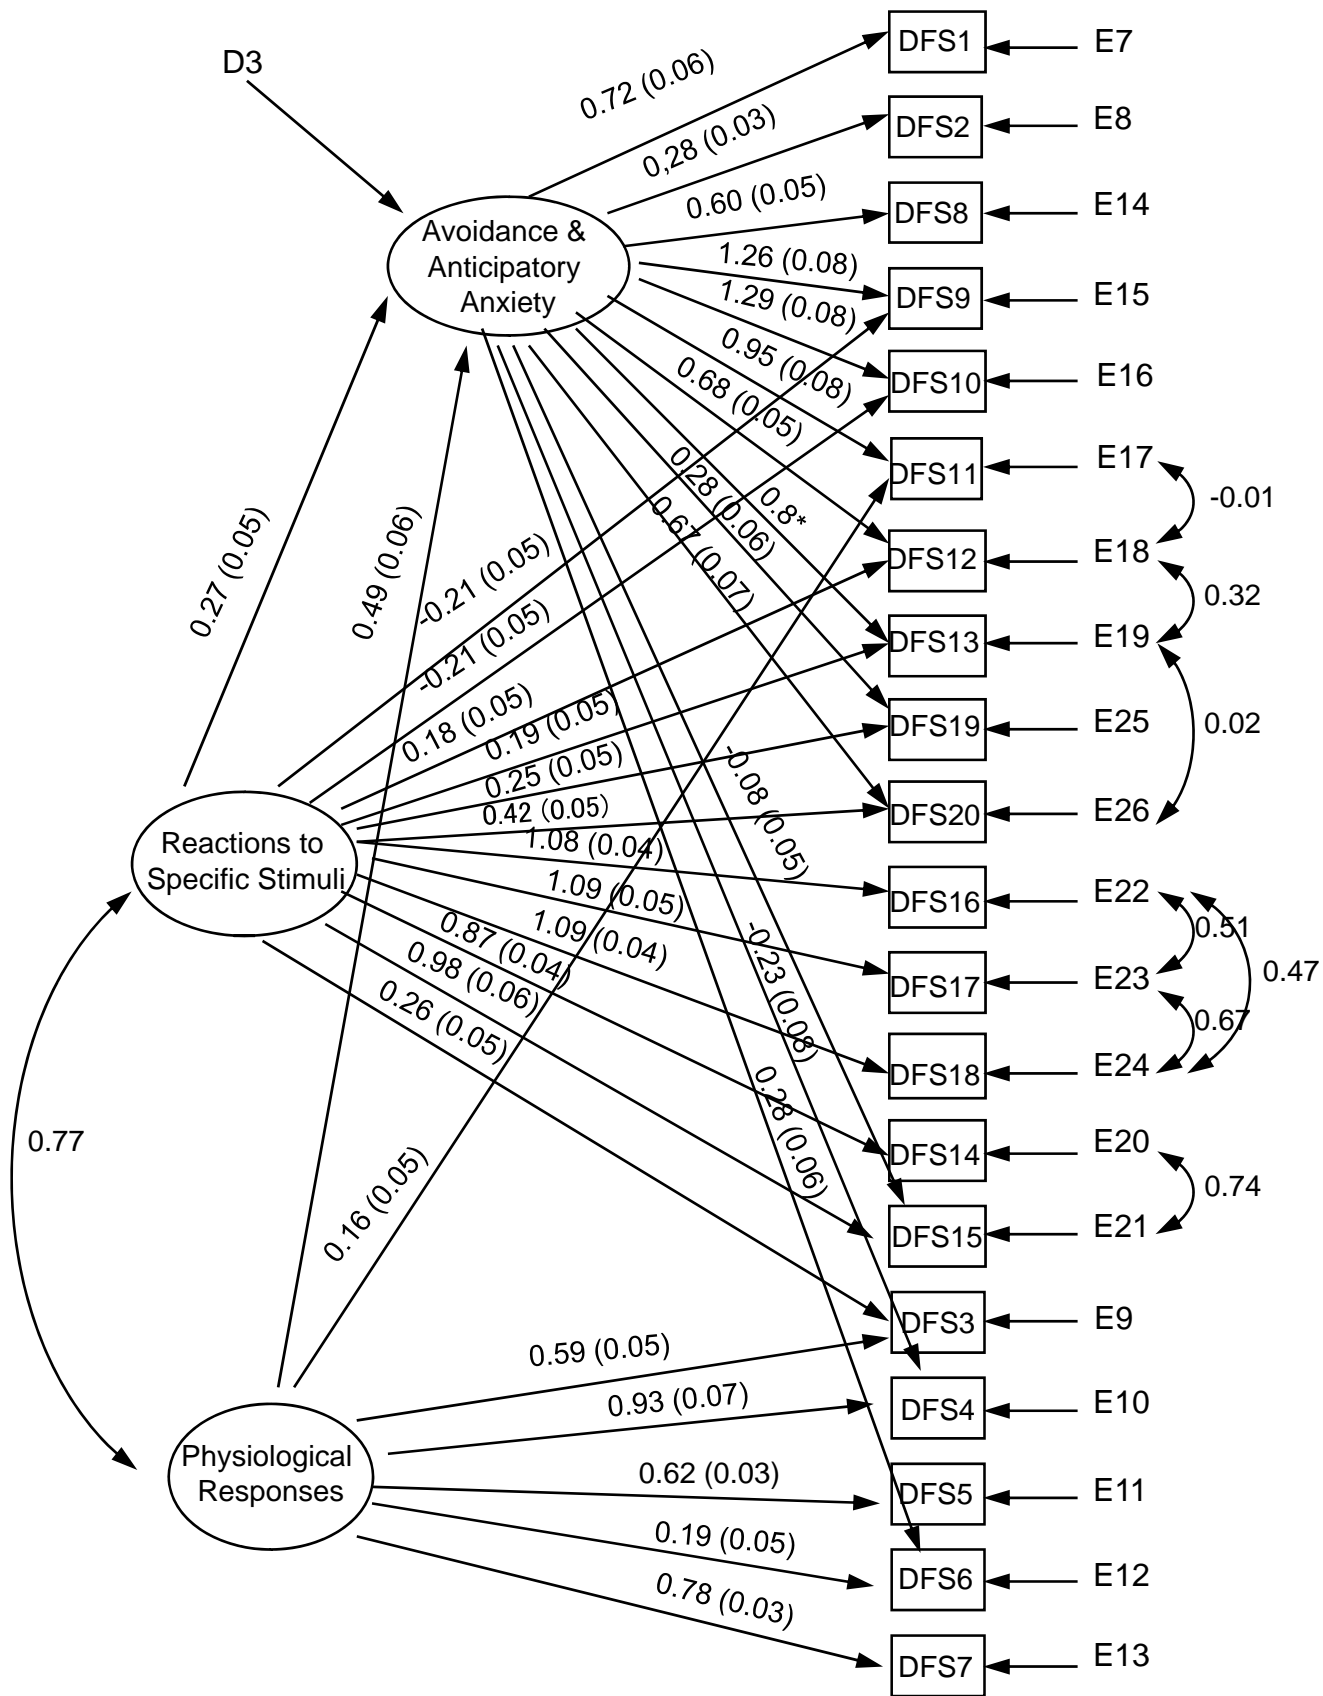

\* A fixed effect

Supplement: MOESM4 [file 9517376]
